# Supplementary material for: Sensitive colorimetric sensors for visual detection of carbon dioxide and sulfur dioxide
Source: Royal Society of Chemistry journal article supplement (doi:10.1039/c4ta06321j), 2015-01-01
Supplement: c4ta06321j1.pdf [file c4ta06321j1.pdf]

Supplementary Information

## Sensitive Colorimetric Sensors for Visual Detection of Carbon Dioxide and Sulfur Dioxide

Chandrani Chatterjee and Ayusman Sen\*

Department of Chemistry, Pennsylvania State University, University Park, PA 16802  
(U.S.A.). E-mail: [asen@psu.edu](mailto:asen@psu.edu)

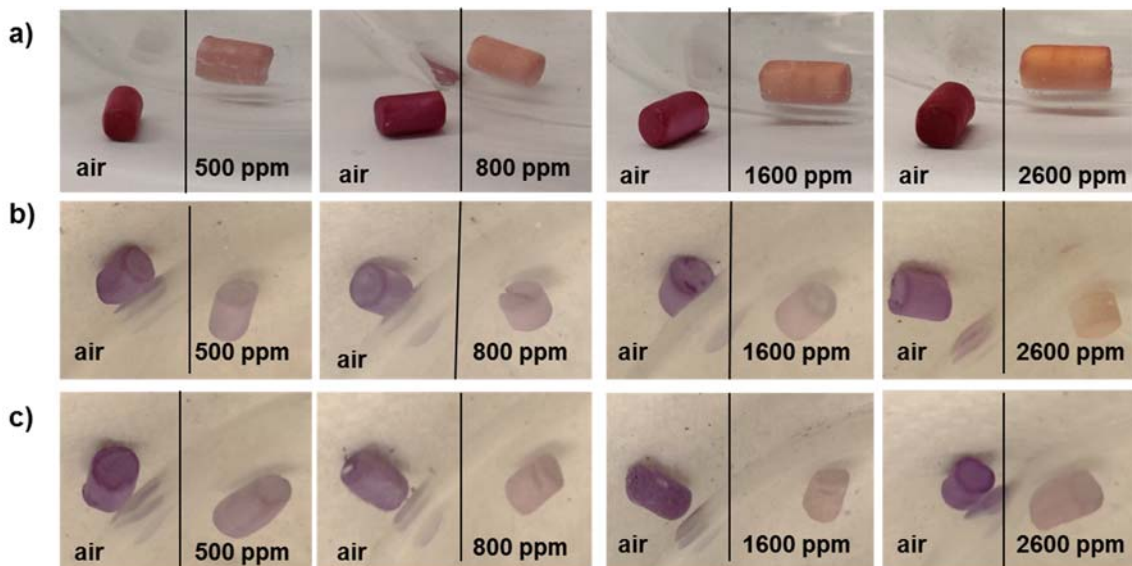

Figure S1. Visual detection and estimation of the amount of dry CO<sub>2</sub> present within an enclosed atmosphere using a) Al<sub>2</sub>O<sub>3</sub>-dimethylethanolamine-cresol red, b) Al<sub>2</sub>O<sub>3</sub>-methyldiethanol amine-cresol red, and c) Al<sub>2</sub>O<sub>3</sub>-triethanolamine-cresol red sensors. The visual color changes in response to 500 ppm, 800 ppm, 1600 ppm and 2600 ppm dry CO<sub>2</sub> in nitrogen are compared with a reference sensor left under ambient air (~ 400 ppm CO<sub>2</sub>).

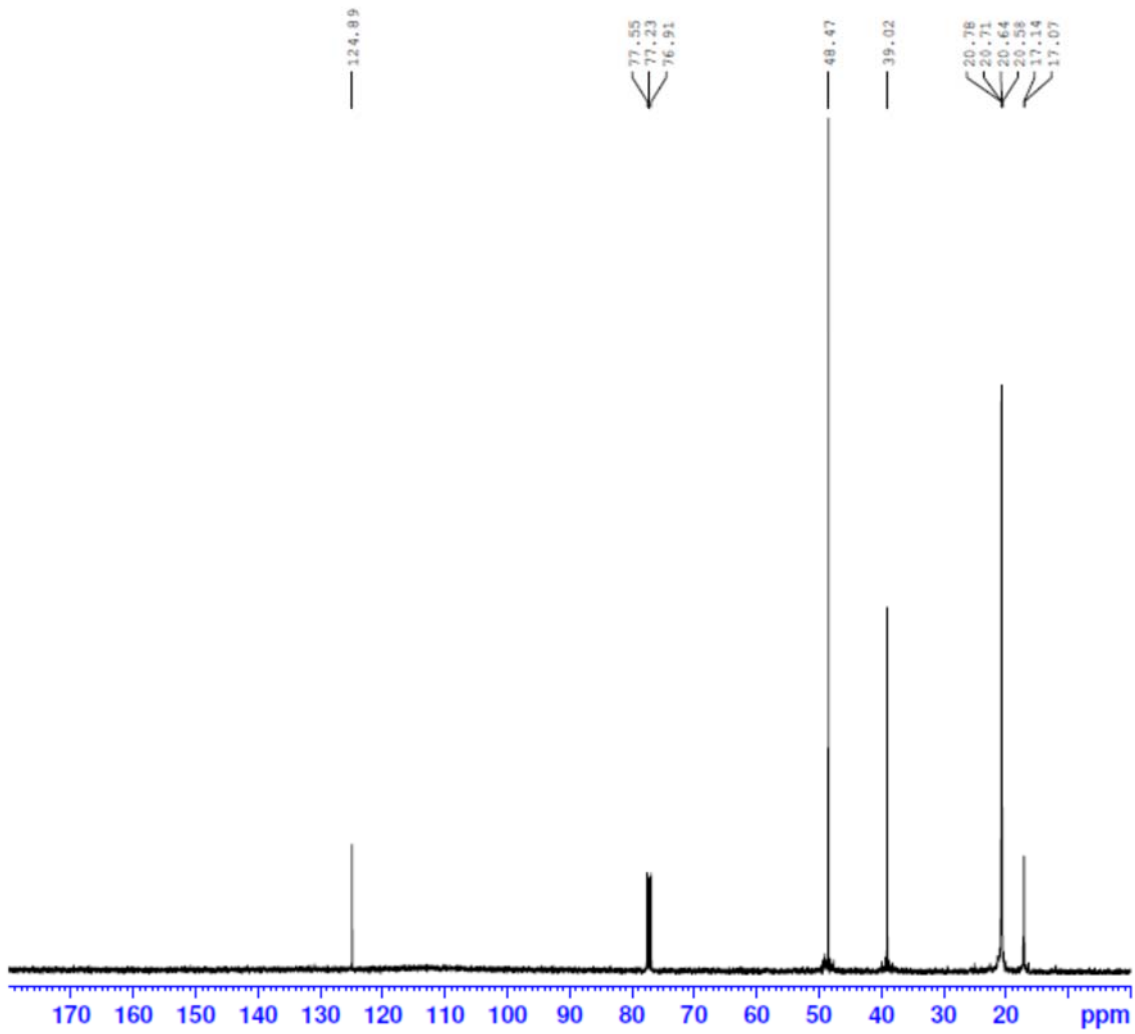

Figure S2.  $^{13}\text{C}$  NMR spectra of N,N-diisopropylethylamine in dry  $\text{CDCl}_3$  in the presence of  $^{13}\text{CO}_2$  (free  $\text{CO}_2$ , 124.4 ppm). The formation of bicarbonate was not observed.

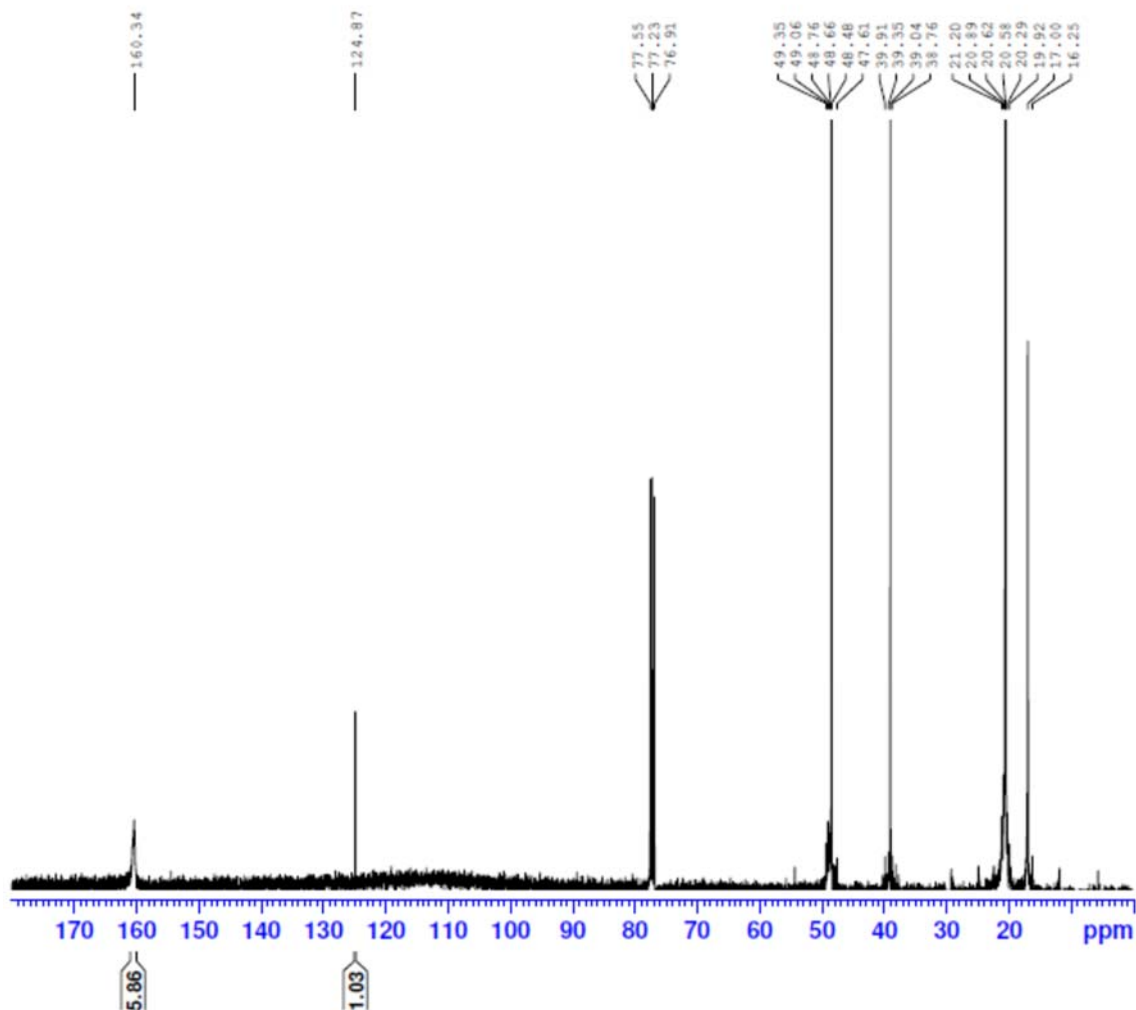

Figure S3.  $^{13}\text{C}$  NMR spectra of N,N-diisopropylethylamine in  $\text{CDCl}_3$  containing 20  $\mu\text{L}$   $\text{D}_2\text{O}$ , in the presence of  $^{13}\text{CO}_2$  (free  $\text{CO}_2$ , 124.4 ppm). The *in situ* formed bicarbonate peak is observed  $\sim 160.3$  ppm.

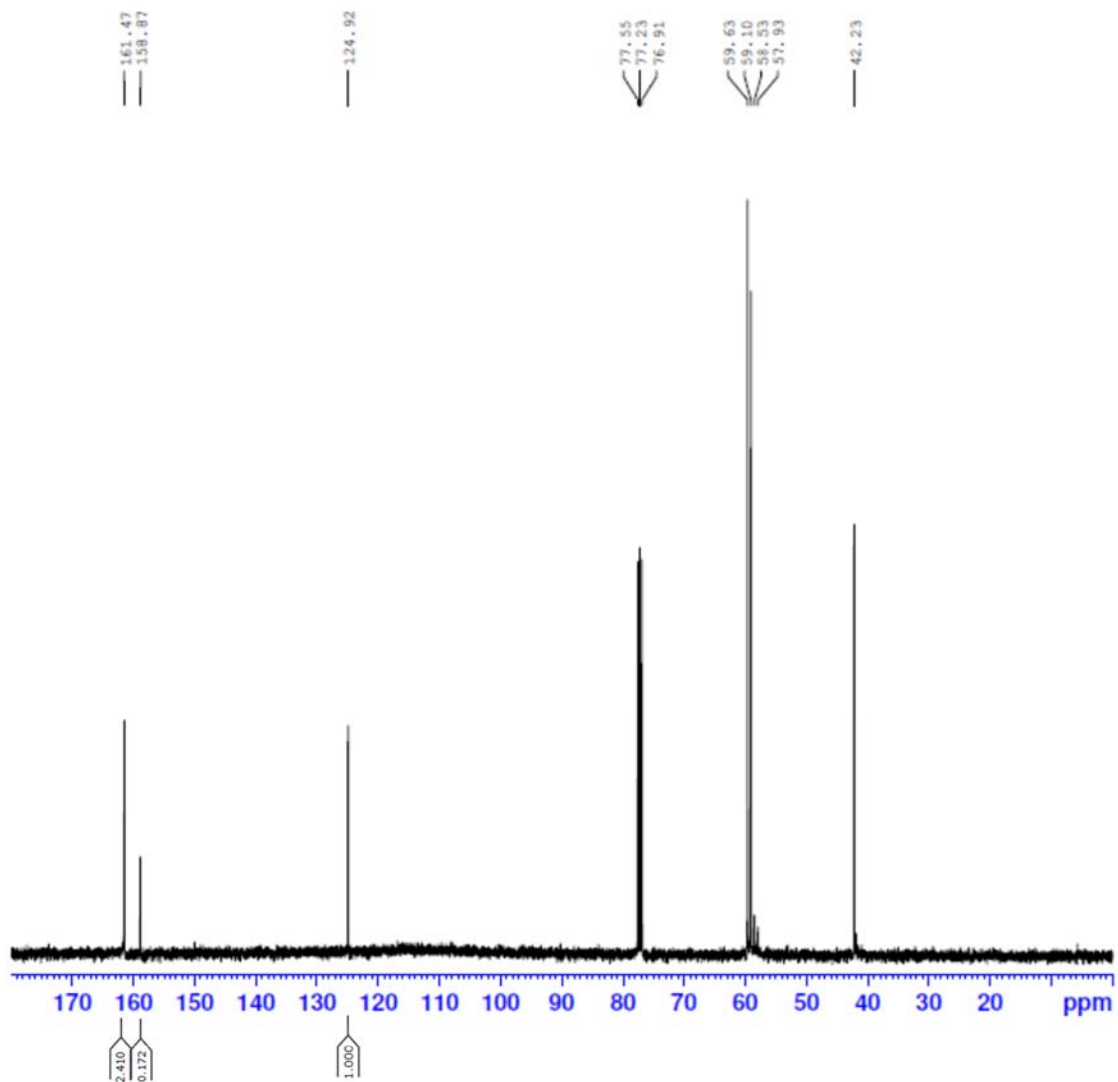

Figure S4.  $^{13}\text{C}$  NMR spectra of  $^{13}\text{CO}_2$  (free  $\text{CO}_2$ , 124.4 ppm) binding by MDEA, in the presence of 20  $\mu\text{L}$   $\text{D}_2\text{O}$ , in  $\text{CDCl}_3$ . The resonance due to alkylcarbonate formation is observed  $\sim 159$  ppm and the bicarbonate peak is observed  $\sim 161$  ppm.

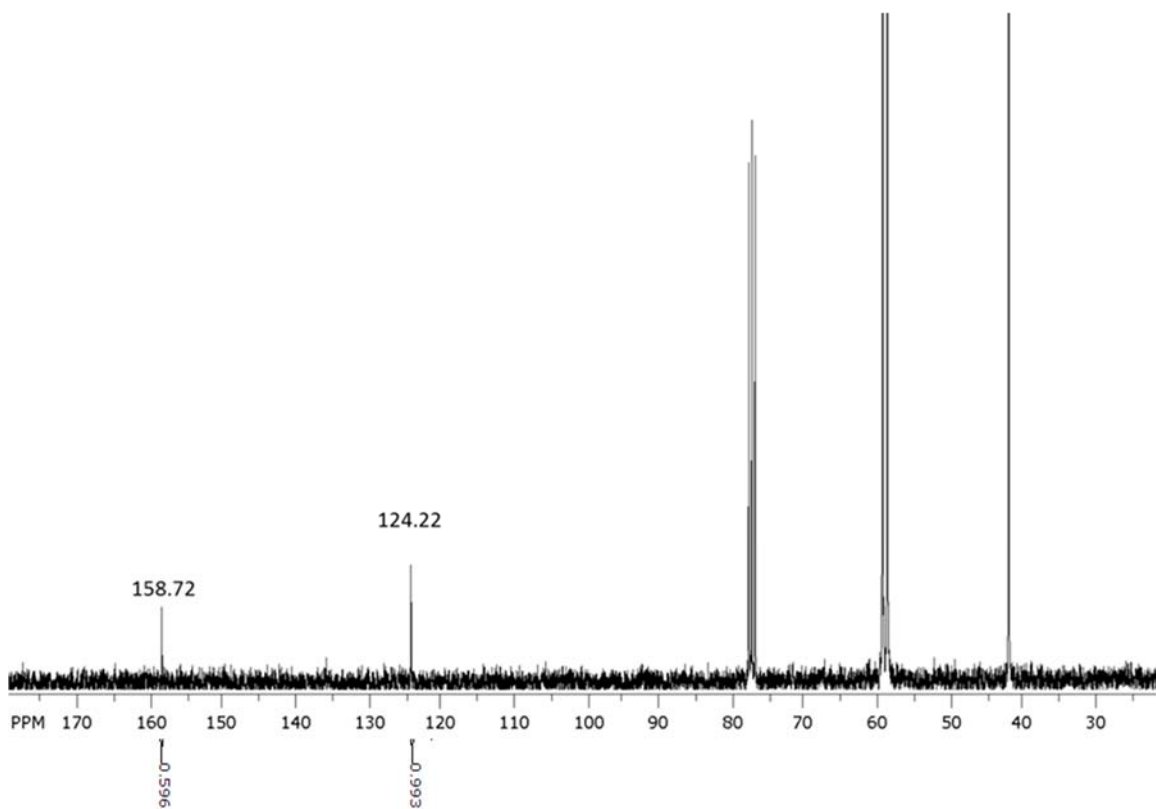

Figure S5.  $^{13}\text{C}$  NMR spectra of  $^{13}\text{CO}_2$  (free  $\text{CO}_2$ , 124.4 ppm) binding by MDEA in dry  $\text{CDCl}_3$ . Only the *in situ* formed alkylcarbonate peak was observed  $\sim 159$  ppm.

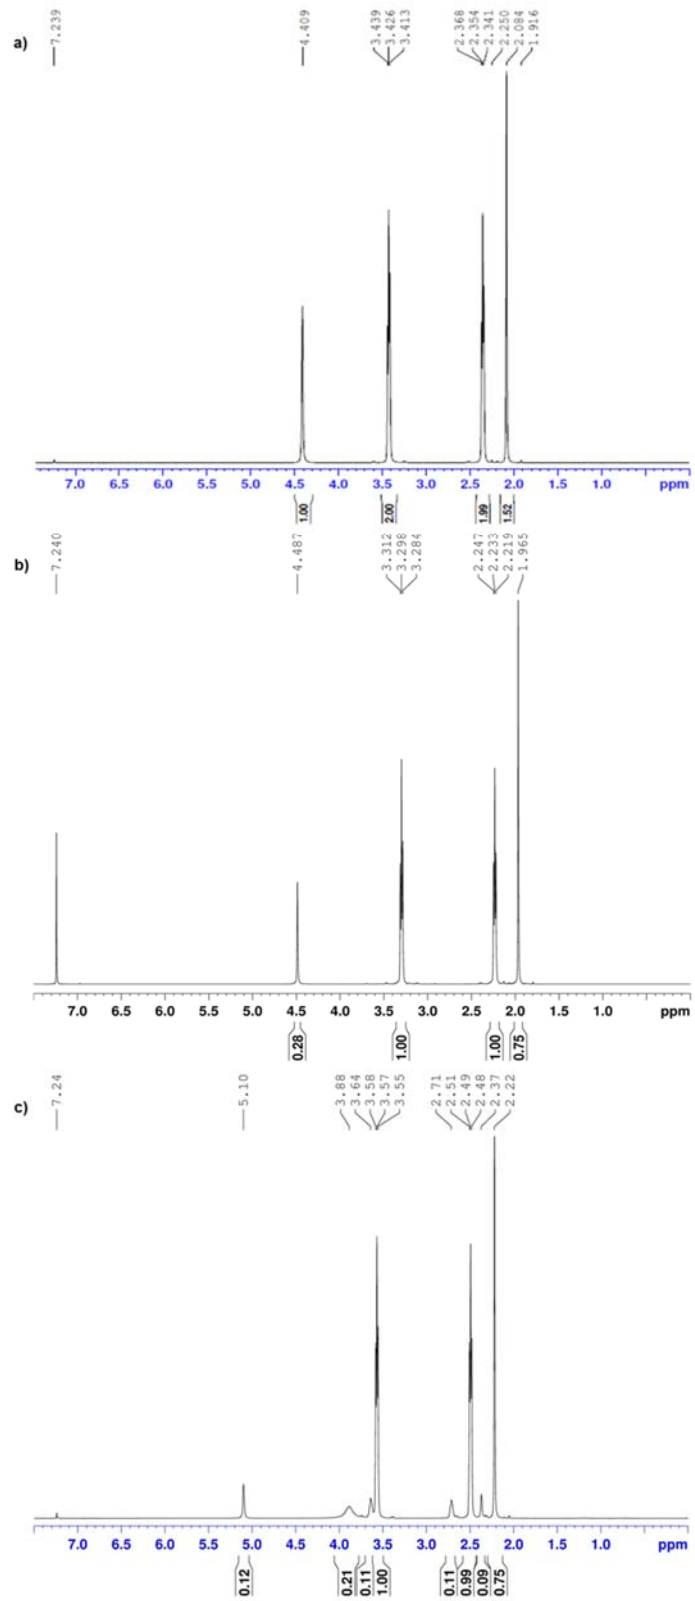

Figure S6. The  $^1\text{H}$  NMR spectra of N-methyldiethanolamine in  $\text{CDCl}_3$ : a) before  $\text{CO}_2$  uptake, b) after  $\text{CO}_2$  uptake, and c) after  $\text{CO}_2$  uptake in the presence of 20  $\mu\text{L}$   $\text{D}_2\text{O}$ . New resonances appear only upon the uptake of  $\text{CO}_2$  in the presence of water (Figure S6c).

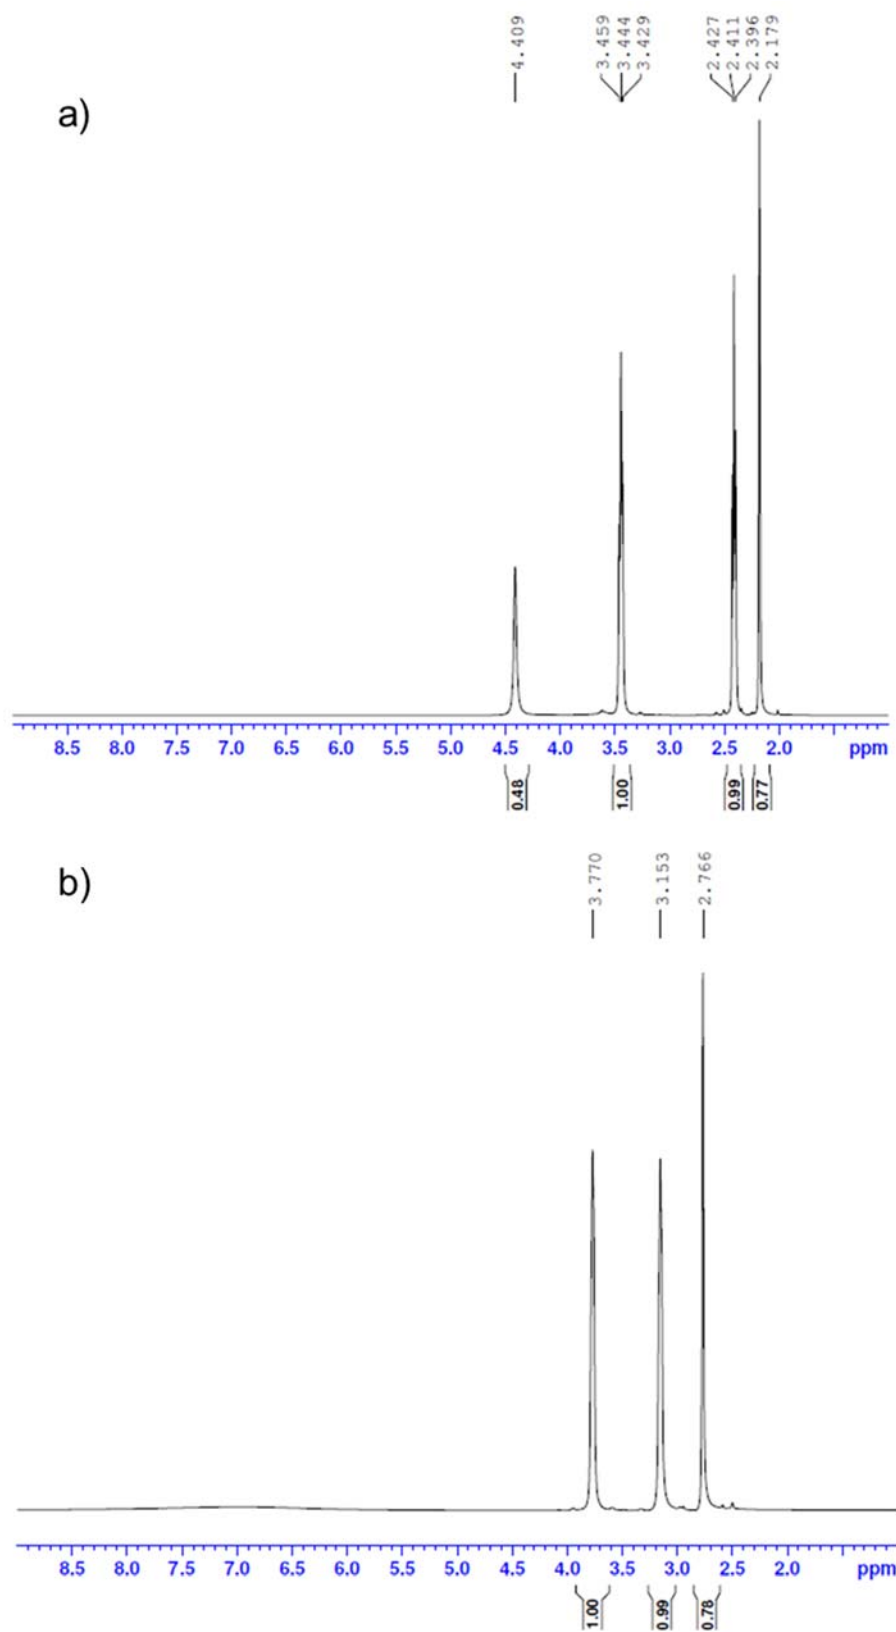

Figure S7.  $^1\text{H}$  NMR spectra of a) MDEA and b)  $\text{SO}_2$  binding by MDEA in  $\text{DMSO-d}_6$ .

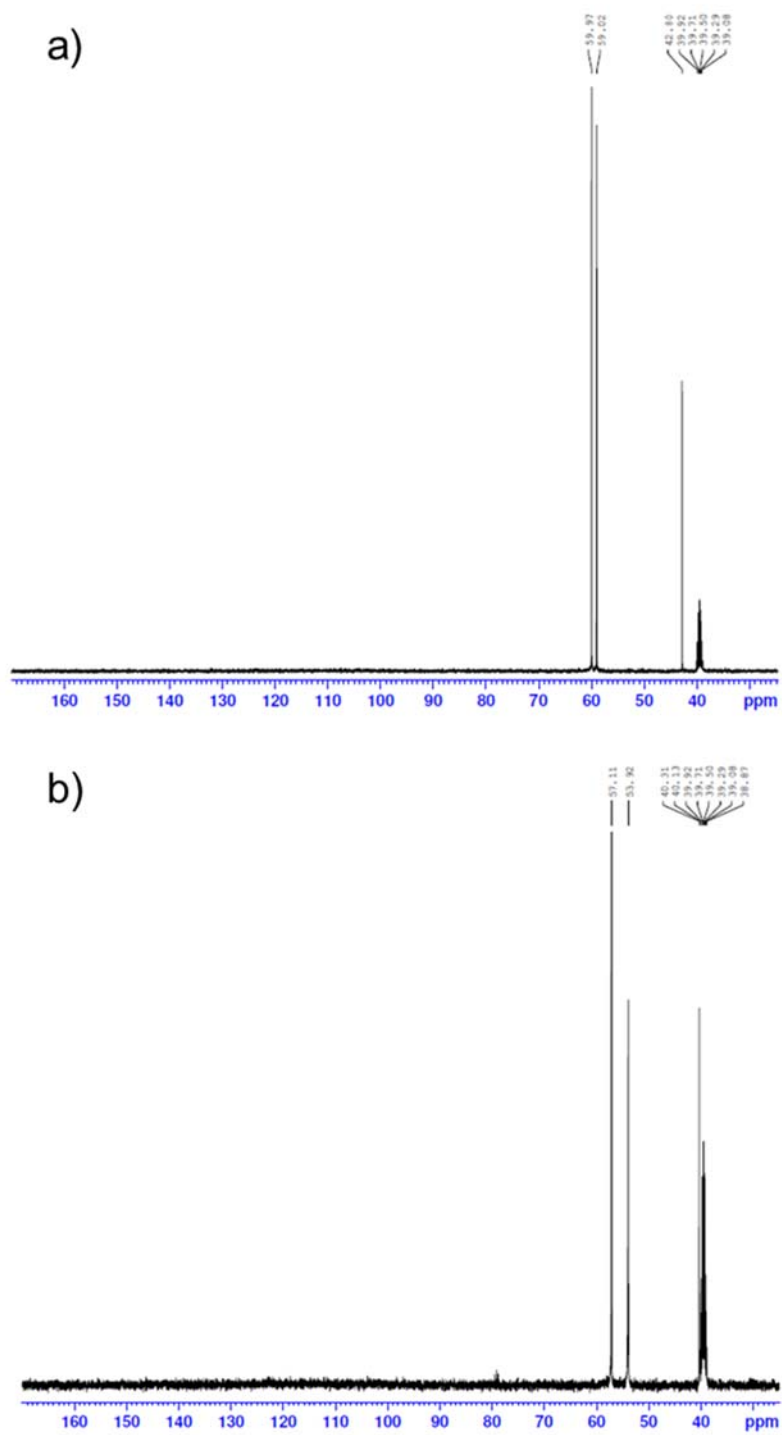

Figure S8.  $^{13}\text{C}$  NMR spectra of a) MDEA and b)  $\text{SO}_2$  binding by MDEA in  $\text{DMSO-d}_6$ .
